# Supplementary material for: Population genetics data help to guide the conservation of palm species with small population sizes and fragmented habitats in Madagascar
Source: PeerJ. 2017 May 3;5:e3248. doi: 10.7717/peerj.3248 (PMC5419215; doi:10.7717/peerj.3248)
Supplement: Supplemental Information 2 — AFLP coded data for 50 Dypsis decipiens samples, 3 primer combinations, 370 loci. [file peerj-05-3248-s002.xlsx]

## Sheet: dec 3 markers
		Allele 1	Allele 2	Allele 3	Allele 4	Allele 5	Allele 6	Allele 7	Allele 8	Allele 9	Allele 10	Allele 11	Allele 12	Allele 13	Allele 14	Allele 15	Allele 16	Allele 17	Allele 18	Allele 19	Allele 20	Allele 21	Allele 22	Allele 23	Allele 24	Allele 25	Allele 26	Allele 27	Allele 28	Allele 29	Allele 30	Allele 31	Allele 32	Allele 33	Allele 34	Allele 35	Allele 36	Allele 37	Allele 38	Allele 39	Allele 40	Allele 41	Allele 42	Allele 43	Allele 44	Allele 45	Allele 46	Allele 47	Allele 48
27	D3	0	1	0	1	0	1	1	0	0	1	1	1	1	1	1	0	0	0	1	1	0	0	1	1	0	1	0	0	1	0	1	1	0	1	0	1	1	0	0	1	1	1	0	1	0	1	1	0
29	D3	0	1	0	1	0	1	1	0	1	0	1	1	0	1	1	0	0	0	1	1	0	0	0	1	0	1	0	0	1	0	1	0	1	1	0	0	1	0	1	1	1	1	0	0	0	1	1	0
34	D3	0	1	0	1	0	0	0	1	1	0	1	1	0	1	0	0	0	0	1	1	0	0	0	1	0	1	0	0	1	0	1	0	0	1	0	1	1	0	1	1	1	1	0	1	0	1	1	1
37	D3	0	1	0	1	0	0	1	0	0	1	0	1	1	1	0	0	0	0	1	1	0	0	0	1	0	1	0	0	1	0	1	0	0	1	0	1	1	0	1	1	1	1	0	0	0	1	1	0
38	D3	0	1	1	1	0	0	1	0	0	1	0	1	0	1	1	0	0	0	1	1	0	0	0	1	0	1	0	0	1	0	1	0	0	1	0	0	1	0	1	1	1	1	0	1	0	1	1	0
45	D3	0	1	1	1	0	1	1	0	1	1	0	1	0	1	0	0	0	0	1	1	0	0	0	1	0	1	0	0	1	0	1	0	0	1	0	1	1	1	1	1	1	1	0	1	0	1	1	1
57	D3	1	1	0	1	0	1	1	0	1	1	0	1	0	1	1	0	0	0	1	1	0	0	0	1	0	1	0	0	1	0	1	0	0	1	0	1	1	0	0	1	1	1	1	0	0	1	1	0
83	D1	0	1	0	1	0	1	1	1	0	1	0	1	0	1	0	0	0	0	1	1	0	0	0	1	0	1	0	0	1	0	1	0	0	1	0	1	1	0	0	1	1	1	1	0	0	1	1	0
85	D1	0	1	0	1	0	1	1	0	1	1	0	1	0	1	0	0	0	0	1	1	0	0	0	1	0	1	0	0	1	0	1	0	1	1	0	1	1	1	0	1	1	1	1	0	0	1	1	1
89	D1	0	1	0	1	0	1	1	0	0	1	0	1	0	1	0	0	0	0	1	1	0	0	0	1	0	1	0	0	1	0	1	0	0	1	0	0	1	0	0	1	1	1	1	0	0	1	1	0
94	D3	0	1	0	1	0	1	1	0	1	1	0	1	0	1	0	0	0	0	1	1	0	0	0	1	0	1	0	0	1	0	1	0	0	1	0	0	1	1	1	1	1	1	0	1	0	1	1	0
96	D2	0	1	0	1	0	1	1	1	0	1	0	1	0	1	0	0	0	0	1	1	1	0	0	1	0	1	0	0	1	0	1	0	1	1	0	1	1	1	0	1	1	1	1	0	0	1	1	0
98	D2	0	1	0	1	0	0	1	0	1	1	0	1	0	1	1	0	0	0	1	1	0	0	0	1	0	1	0	0	1	0	1	0	1	1	0	1	1	0	1	1	1	1	0	1	0	1	1	1
106	D2	0	1	0	1	0	1	1	0	1	1	0	1	1	1	1	0	0	0	1	1	0	0	0	1	0	1	0	0	1	0	1	0	0	1	1	0	1	0	1	1	1	1	1	1	0	1	1	0
108	D2	0	1	0	1	0	1	1	0	1	1	0	1	0	1	0	0	0	0	1	1	0	0	0	1	0	1	0	0	1	0	1	0	0	1	0	1	1	0	0	1	1	1	1	1	0	1	1	1
109	D2	0	1	0	0	1	1	1	0	1	1	0	1	0	1	1	0	0	0	1	1	0	1	0	1	0	1	0	0	1	1	1	0	0	1	0	1	1	0	1	1	1	1	0	1	0	1	1	1
111	D2	1	1	1	1	0	1	1	0	1	1	0	1	0	1	1	0	0	0	1	1	0	0	0	1	0	1	0	0	1	0	1	0	0	1	0	0	1	0	0	1	1	1	0	1	0	1	1	0
113	D2	1	1	0	1	0	1	1	0	1	1	0	1	0	1	1	0	0	0	1	1	0	0	0	1	0	1	0	0	1	0	1	0	0	1	0	0	1	0	1	1	1	1	0	1	0	1	1	1
115	D2	0	1	0	1	0	1	1	0	1	1	0	1	0	1	0	0	0	0	1	1	0	0	0	1	0	1	0	0	1	0	1	0	0	1	0	0	1	0	1	1	1	1	0	1	0	1	1	1
116	D2	0	1	1	1	0	1	1	0	1	1	0	1	0	1	1	0	0	0	1	1	0	1	0	1	0	1	0	0	1	0	1	0	0	1	0	0	1	0	1	1	1	1	0	1	0	1	1	1
118	D4	0	1	0	1	0	1	1	0	1	1	0	1	0	1	1	0	0	0	1	1	0	0	0	1	0	1	0	0	1	0	1	0	1	1	0	0	1	0	1	1	1	1	1	0	0	1	1	0
119	D4	0	1	0	1	0	1	0	0	1	1	0	1	0	1	0	0	0	0	1	1	0	0	0	1	0	1	0	0	1	0	1	0	1	1	1	0	1	1	1	1	1	1	0	1	0	1	1	1
121	D4	0	1	0	1	0	1	1	0	1	1	0	1	0	1	0	0	0	0	1	1	0	0	0	1	0	1	0	0	1	0	1	0	0	1	0	0	1	1	1	1	1	1	0	1	0	1	1	1
123	D4	0	1	0	1	0	1	1	0	1	1	0	1	0	1	0	0	0	0	1	1	0	0	0	1	1	1	0	0	1	0	1	1	0	1	0	1	1	1	0	1	1	1	0	0	0	1	1	1
127	D3	0	1	0	0	0	1	1	0	1	1	0	1	0	1	0	0	0	0	1	1	0	0	0	1	0	1	0	0	1	0	1	0	1	1	0	1	1	0	0	0	1	1	0	0	0	1	1	0
128	D3	0	1	0	1	0	1	1	0	1	1	0	1	0	1	0	0	0	0	1	1	0	0	0	1	0	1	0	0	1	0	1	0	0	1	0	1	1	0	0	1	1	1	0	0	0	1	1	0
131	D3	0	1	0	0	0	0	1	0	1	1	0	1	0	1	0	0	0	0	1	1	0	0	0	1	0	1	0	0	1	0	1	0	1	1	0	1	1	0	1	1	1	0	0	0	0	1	1	1
134	D3	0	1	0	0	0	0	1	1	1	0	1	1	1	1	0	0	0	0	1	1	0	0	0	1	0	1	0	0	1	0	1	1	0	1	0	0	1	1	1	1	1	1	1	0	0	1	1	1
136	D3	0	1	0	0	0	1	1	0	1	0	1	1	0	1	0	0	0	0	1	1	0	0	0	1	0	1	0	0	1	0	1	0	0	1	0	1	1	0	1	1	1	1	0	0	0	1	1	0
138	D3	1	1	1	1	0	1	0	1	1	0	1	1	0	1	1	0	0	0	1	1	0	0	0	1	0	1	0	0	1	1	1	0	0	1	0	0	1	1	1	1	1	1	1	1	0	1	1	1
148	D7	1	1	1	0	0	1	0	0	1	0	1	1	1	1	1	1	1	0	0	0	1	1	0	0	0	1	0	0	1	0	1	0	0	1	0	0	1	0	1	1	1	0	1	1	1	1	1	1
152	D7	0	1	0	0	0	1	1	1	0	1	0	1	0	1	1	0	0	0	1	1	0	1	0	0	0	1	0	0	1	0	1	0	0	1	0	0	1	0	1	1	1	1	1	1	1	1	1	1
156	D6	0	1	1	1	0	1	1	1	0	1	0	1	0	1	0	0	0	0	1	1	0	0	0	1	1	1	1	0	1	0	1	0	0	1	0	1	1	1	1	1	1	0	1	1	1	1	1	0
157	D6	0	1	0	1	0	1	1	0	1	1	0	1	0	1	0	0	0	0	1	1	0	1	0	1	1	1	0	0	1	0	1	0	0	1	0	0	1	1	0	1	1	0	0	1	1	1	1	0
160	D1	1	1	0	1	0	1	1	1	0	1	0	1	0	1	0	0	0	0	1	1	0	0	0	1	0	1	0	0	1	0	1	0	0	1	0	0	1	1	0	1	1	0	0	1	1	1	1	1
161	D1	0	1	0	0	0	0	0	1	1	0	1	1	0	1	0	0	0	0	1	1	0	0	0	1	0	1	0	0	1	0	1	0	1	1	0	1	1	0	1	1	1	0	0	1	1	1	1	0
170	D3	0	1	0	1	0	1	1	0	1	1	0	1	0	1	0	0	0	0	1	1	0	0	0	1	0	1	0	0	1	0	1	0	0	1	0	1	1	1	1	1	1	1	1	0	1	1	1	0
171	D3	0	1	0	0	1	1	1	0	1	1	0	1	0	1	0	0	0	0	1	1	0	0	0	1	0	1	0	0	1	0	1	0	0	1	0	0	1	0	1	1	1	1	0	1	0	1	1	0
172	D3	0	1	0	1	0	1	0	1	1	0	1	1	0	1	1	0	0	0	1	1	0	0	0	1	0	1	0	0	1	0	1	0	0	1	0	1	1	0	1	1	1	1	0	1	1	1	1	1
173	D3	0	1	0	1	0	1	1	0	1	0	1	1	0	1	1	0	0	0	1	1	1	0	0	1	0	1	0	0	1	0	1	0	0	1	0	0	1	1	1	1	1	0	1	1	1	1	1	0
174	D3	0	1	0	1	1	1	0	1	1	0	1	1	0	1	0	0	0	0	1	1	0	0	0	1	0	1	0	0	1	0	1	0	0	1	0	1	1	0	1	1	1	0	1	1	1	1	1	1
175	D3	0	1	1	1	0	1	0	1	0	0	1	1	0	1	1	0	0	0	1	1	0	1	0	1	0	1	1	0	1	0	1	1	0	1	0	0	1	0	0	1	1	1	0	1	1	1	1	1
176	D3	0	1	1	1	0	1	0	1	1	0	1	1	0	1	0	0	0	0	1	1	0	0	0	1	0	1	0	0	1	0	1	0	0	1	0	1	1	0	0	1	1	1	0	1	1	1	1	1
178	D3	0	1	1	1	0	1	1	0	1	1	0	1	0	1	1	0	0	0	1	1	0	0	0	1	0	1	0	0	1	0	1	0	0	1	0	0	1	1	0	1	1	0	0	1	1	1	1	1
179	D	0	1	0	1	0	1	1	0	1	1	0	1	0	1	1	0	0	0	1	1	0	0	0	1	0	1	0	0	1	0	1	0	0	1	0	0	1	1	1	1	1	0	0	1	1	1	1	1
180	D3	0	1	0	1	0	1	1	0	1	1	0	1	0	1	0	0	0	0	1	1	0	0	0	1	0	1	0	0	1	0	1	0	0	1	0	0	1	0	1	1	1	0	1	1	1	1	1	1
182	D3	0	1	1	1	0	1	1	0	1	1	0	1	0	1	1	0	0	0	1	1	0	1	0	0	0	1	0	0	1	0	1	0	0	1	0	0	1	0	0	1	1	0	1	0	1	1	1	0
199	D5	0	1	0	1	0	0	0	1	1	0	1	1	0	1	1	0	0	0	1	1	0	0	0	1	1	1	0	0	1	0	1	0	0	1	0	0	1	1	1	1	1	0	1	1	1	1	1	0
200	D5	0	1	0	1	0	1	1	0	1	0	1	1	0	1	1	0	0	0	1	1	0	0	0	1	0	1	0	0	1	0	1	0	0	1	0	0	1	0	1	1	1	1	1	0	1	1	1	0
203	D5	0	1	0	1	0	1	1	0	1	1	0	1	0	1	1	0	0	0	1	1	0	0	0	1	0	1	0	0	1	0	1	0	0	1	0	0	1	0	1	1	1	0	1	0	1	1	1	0
[truncated: 322 more columns]
